# Supplementary material
Source: PubMed Central journal article supplement (PMC3678525)
Supplement: NIHMS449837-supplement-2_si_001.pdf [file NIHMS449837-supplement-2_si_001.pdf]

**Supporting Information for**

**Factors Influencing Conversion Kinetics of  
Triply-Bridged ( $\mu$ - $\eta^1$ : $\eta^1$ -Peroxo)Diiron(III) Intermediates to  
Doubly-Bridged ( $\mu$ - $\eta^1$ : $\eta^1$ -Peroxo)Diiron(III) Intermediates**

Jonathan R. Frisch,<sup>†</sup> Ryan McDonnell,<sup>‡</sup> Elena V. Rybak-Akimova<sup>\*,‡</sup> and Lawrence Que, Jr.<sup>\*,†</sup>

<sup>†</sup> *Department of Chemistry and Center for Metals in Biocatalysis, University of Minnesota, 207 Pleasant St. S.E., Minneapolis, MN 55455.*

<sup>‡</sup> *Department of Chemistry, Tufts University, 62 Talbot Ave., Medford, MA 02155.*

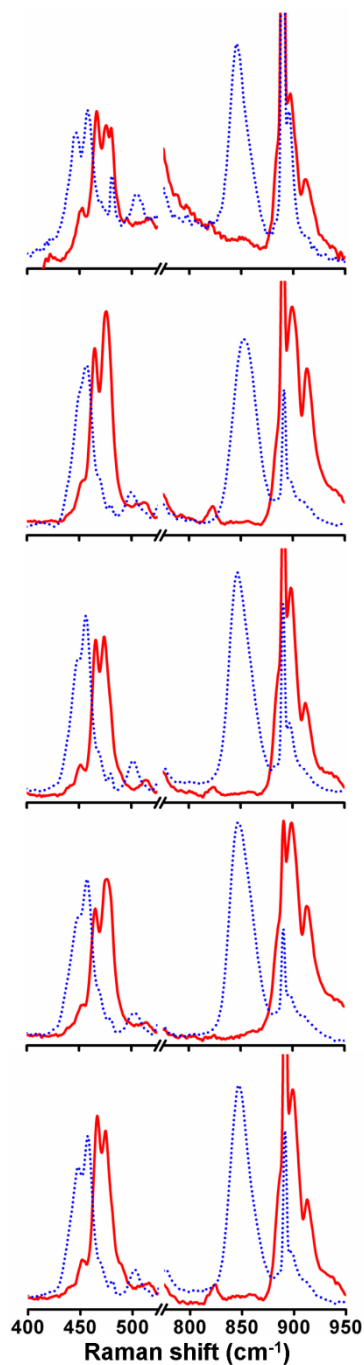

**Figure S1.** From top to bottom, resonance Raman spectra of  $3\bullet\text{O}_2\text{CCMe}_3$ ,  $3\bullet\text{O}_2\text{CC}_6\text{H}_2\text{-}3,4,5\text{-(OMe)}_3$ ,  $3\bullet\text{O}_2\text{CC}_6\text{H}_3\text{-}3,4\text{-(OMe)}_2$ ,  $3\bullet\text{O}_2\text{CC}_6\text{H}_3\text{-}3,5\text{-(OMe)}_2$ , and  $3\bullet\text{O}_2\text{CC}_6\text{H}_4\text{-}4\text{-OMe}$  (solid red line =  $^{16}\text{O}_2$ , dotted blue line =  $^{18}\text{O}_2$ ).

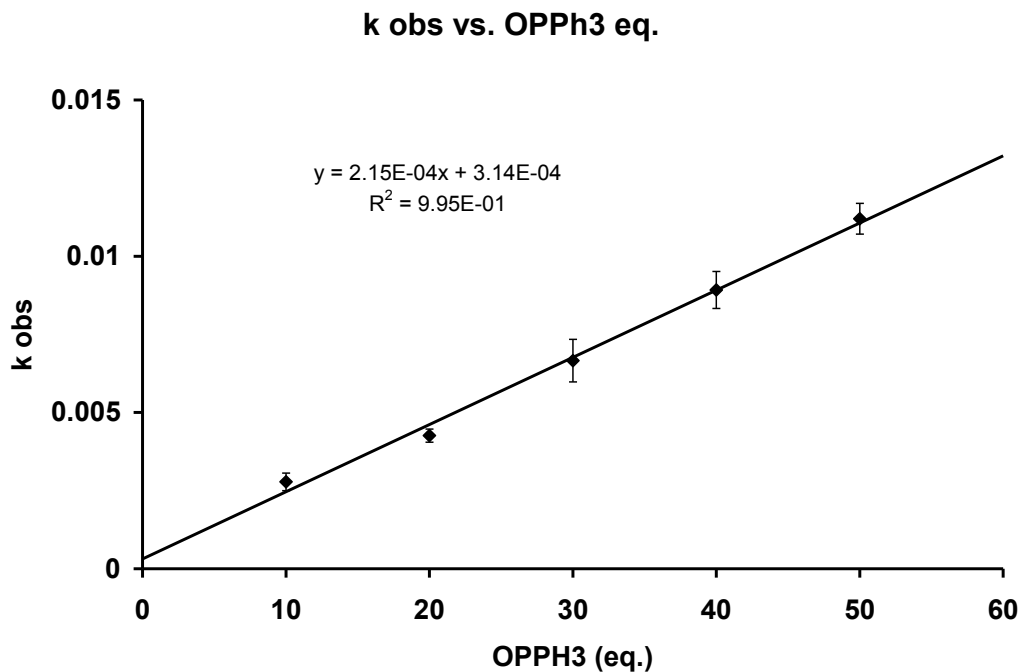

**Figure S2.**  $k_{\text{obs}}$  for the conversion of  $2 \cdot \text{O}_2\text{PPh}_2$  to  $3 \cdot \text{O}_2\text{PPh}_2$  in  $\text{CH}_2\text{Cl}_2$  at  $-40^\circ\text{C}$  was determined by finding the y-intercept produced by finding  $k_{\text{obs}}$  for the conversion induced by addition of varying equivalents of  $\text{OPPh}_3$ .

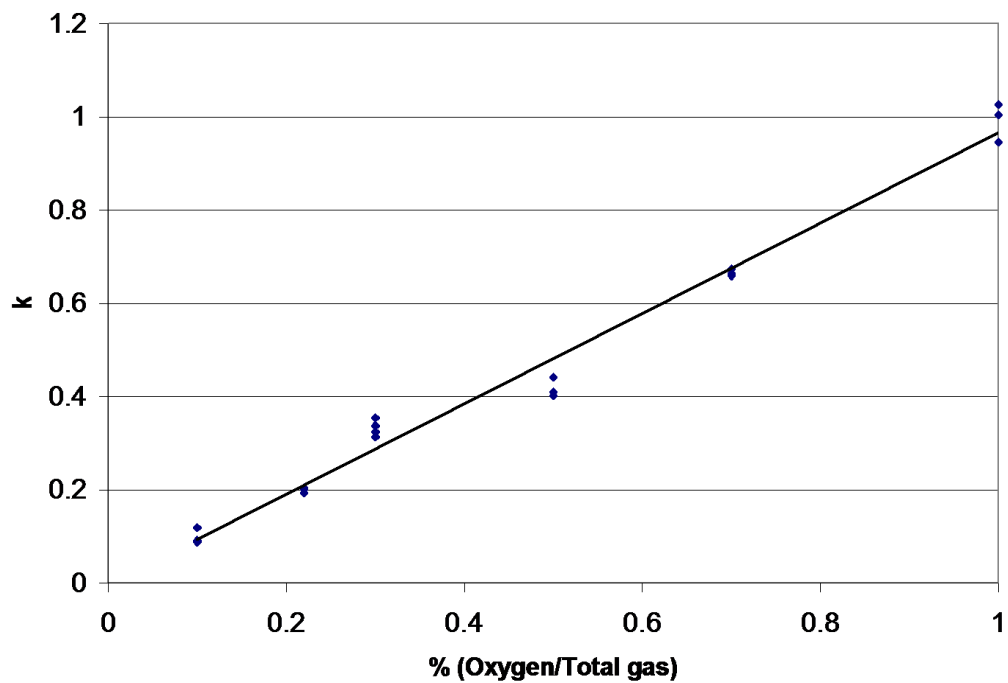

**Figure S3.** Rate constant for formation of  $2 \cdot \text{O}_2\text{PPh}_2$  from  $0.34 \text{ mM } 1 \cdot \text{O}_2\text{PPh}_2$  in  $\text{CH}_2\text{Cl}_2$  as a function of  $\text{O}_2$ . Absorbance measured at  $690 \text{ nm}$  at  $-50^\circ\text{C}$ . Solid lines represent fits of  $R_i = a[\text{O}_2] + b$  to the data where  $a = 0.9692$  and  $b = 0.0033$ .

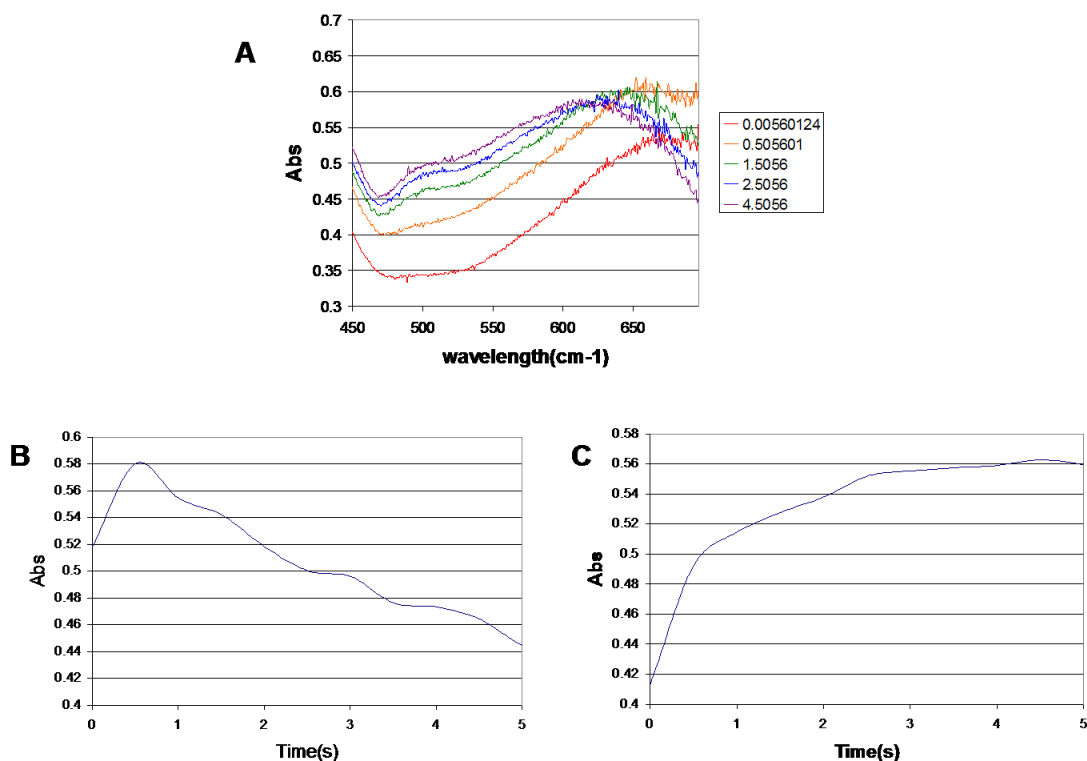

**Figure S4.** Time resolved spectra acquired by stopped-flow technique during the reaction of  $1\bullet\text{O}_2\text{PPh}_2$  (0.364 mM) with  $\text{O}_2$  in MeCN at  $-10\text{ }^\circ\text{C}$  (diode array mode, arc lamp). A) Multi-wavelength spectra between 0-5 s. B) Absorbance between 0-5s at 690 nm. C) Absorbance between 0-5 s at 580 nm. Similar absorbance changes were observed in single-wavelength experiments, but the time scale of the decomposition of  $2\bullet\text{O}_2\text{PPh}_2$  was longer, and the absorbance changes were smaller, indicating partial photodecomposition of  $2\bullet\text{O}_2\text{PPh}_2$  upon illumination with intense white light in diode-array measurements.

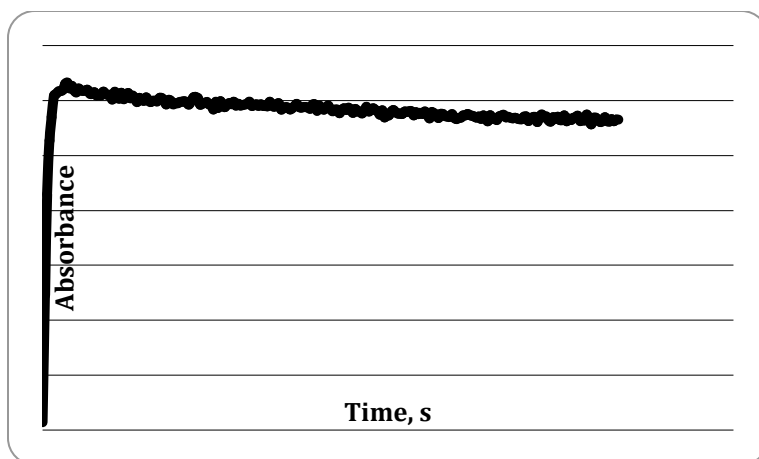

**Figure S5. (A)** Oxygenation of  $1\bullet\text{O}_2\text{CPh}$  in  $\text{CH}_2\text{Cl}_2$  at  $-70\text{ }^\circ\text{C}$  (single-wavelength measurements at 580 nm; 100%  $\text{O}_2$ ).

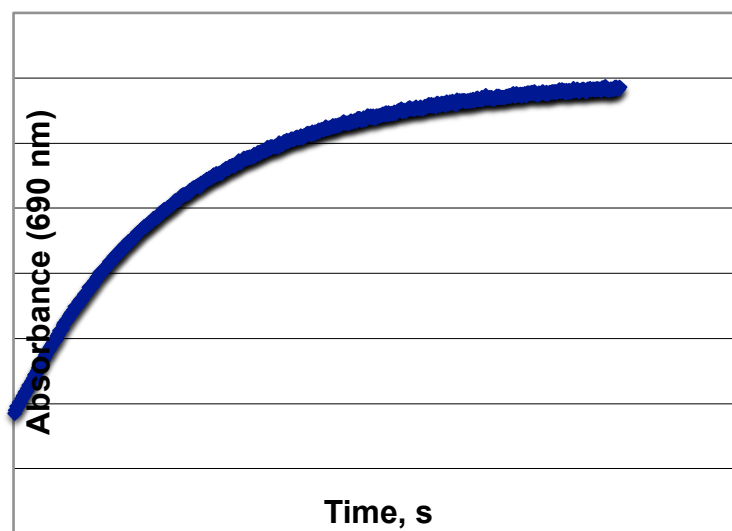

**Figure S5 (B).** Oxygenation of  $1\bullet\text{O}_2\text{CPh}$  in  $\text{CH}_2\text{Cl}_2$  at  $-70\text{ }^\circ\text{C}$  (single-wavelength measurements at 580 nm; 100%  $\text{O}_2$ ).
